# Supplementary material for: A novel dual-site ICT/AIE fluorescent probe for detecting hypochlorite and polarity in living cells
Source: Royal Society of Chemistry journal article supplement (doi:10.1039/d1nj03558d), 2021-01-01
Supplement: d1nj03558d1.pdf [file d1nj03558d1.pdf]

# Electronic Supplementary Information

## A novel dual-site ICT/AIE fluorescent probe for detecting hypochlorite and polarity in living cells

Mingrui Li<sup>a#</sup>, Wangwang Fang<sup>b#</sup>, Bowei Wang<sup>\*a c d</sup>, Yuchao Du<sup>a</sup>, Yuqing Hou<sup>e</sup>,  
Ligong Chen<sup>a c d</sup>, Siqian Cui<sup>a</sup>, Yang Li<sup>a c</sup>, Xilong Yan<sup>\*a c d</sup>

<sup>a</sup> School of Chemical Engineering and Technology, Tianjin University, Tianjin 300350, P. R. China. \*Corresponding authors. E-mail: bwwang@tju.edu.cn, yan@tju.edu.cn; Tel and Fax: +86 22 27406314.

<sup>b</sup> Shaoxing Xingxin New Material Co., Ltd, Zhejiang 312369, P. R. China.

<sup>c</sup> Tianjin Engineering Research Center of Functional Fine Chemicals, Tianjin, P. R. China.

<sup>d</sup> Zhejiang Shaoxing Institute of Tianjin University, Shaoxing, Zhejiang, China

<sup>e</sup> Zhejiang Lonsen Group Co., Ltd, Zhejiang 312300, P. R. China.

#These authors contributed equally to this work.

## Table of content

|                                                                                               |     |
|-----------------------------------------------------------------------------------------------|-----|
| Synthesis.....                                                                                | S3  |
| Preparation of solution of probe <b>CTPA</b> and analytes.....                                | S5  |
| Determination of the detection limit for $\text{ClO}^-$ .....                                 | S6  |
| <b>Table S1.</b> Dual-fluorescent probes for the detection of $\text{ClO}^-$ .....            | S6  |
| <b>Fig. S1.</b> Study of ICT mechanism for $\text{ClO}^-$ sensing.....                        | S7  |
| <b>Fig. S2.</b> Study of AIE mechanism for polarity sensing.....                              | S8  |
| <b>Fig. S3.</b> The time and pH dependent fluorescence spectrums of <b>CTPA</b> .....         | S8  |
| <b>Fig. S4.</b> The pH and viscosity dependent fluorescence spectrums of <b>CTPA</b> .....    | S9  |
| <b>Fig. S5.</b> Study of effect of $\text{ClO}^-$ on polarity detection.....                  | S9  |
| <b>Fig. S6.</b> Study of effect of polarity on $\text{ClO}^-$ detection.....                  | S9  |
| <b>Fig. S7.</b> Cell cytotoxicity of <b>CTPA</b> .....                                        | S10 |
| <b>Fig. S8.</b> Co-localization experiment of <b>CTPA</b> .....                               | S10 |
| <b>Fig. S9.</b> $^1\text{H}$ NMR spectrum of compound <b>1</b> in $\text{DMSO-}d_6$ .....     | S11 |
| <b>Fig. S10.</b> $^{13}\text{C}$ NMR spectrum of compound <b>1</b> in $\text{DMSO-}d_6$ ..... | S11 |
| <b>Fig. S11.</b> HRMS spectrum of <b>CTPA-OH</b> .....                                        | S12 |
| <b>Fig. S12.</b> $^1\text{H}$ NMR spectrum of <b>CTPA</b> in $\text{CDCl}_3$ .....            | S12 |
| <b>Fig. S13.</b> $^{13}\text{C}$ NMR spectrum of <b>CTPA</b> in $\text{CDCl}_3$ .....         | S13 |
| <b>Fig. S14.</b> HRMS spectrum of <b>CTPA</b> .....                                           | S13 |

## Synthesis

### Synthesis of 3-acetyl-7-hydroxycoumarin (compound 1)

The compound **1** was synthesized by 2,4-dihydroxybenzaldehyde and ethyl acetoacetate through a Knoevenagel condensation reaction.<sup>1</sup> In briefly, 2.76 g (20.0 mmol) 2,4-dihydroxybenzaldehyde and 3.12 g (24.0 mmol) ethyl acetoacetate was added into 20 mL ethanol in a 100 mL flask, and then 1.70 g (20.0 mmol) piperidine dissolved in 2 mL ethanol was added dropwise into the mixture, after which 0.1 mL acetic acid was added by drops. The mixture was stirred at room temperature for about 5 h. Crude product was obtained after the solvent was removed by evaporation and the residue was washed by a small amount of ethanol. The crude product was further purified by column chromatography (ethyl acetate) and the pure compound **1** was obtained as a yellow solid (79.1% yield). <sup>1</sup>H NMR (400 MHz, DMSO-*d*<sub>6</sub>) δ 11.15 (s, 1H), 8.59 (s, 1H), 7.79 (d, *J* = 8.6 Hz, 1H), 6.85 (dd, *J* = 8.6 Hz, *J* = 2.3 Hz, 1H), 6.75 (d, *J* = 2.2 Hz, 1H), 2.55 (s, 3H). <sup>13</sup>C NMR (100 MHz, DMSO-*d*<sub>6</sub>) δ 195.0, 164.6, 159.5, 157.7, 148.3, 133.1, 119.5, 114.6, 111.2, 102.2, 30.5 (Fig. S9-S10, ESI<sup>†</sup>).

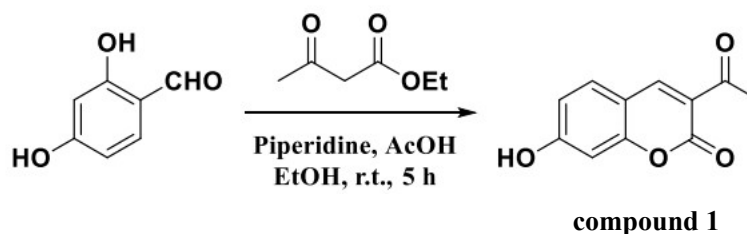

### Synthesis of (E)-3-(3-(4-(diphenylamino) phenyl)-7-hydroxy coumarin (CTPA-OH)

The **CTPA-OH** was synthesized by compound **1** (1.02 g, 5.0 mmol) and 4-diphenylamine benzaldehyde (1.78 g, 6.5 mmol) with ethanol (10 mL) and acetonitrile (10 mL) as the mixed solvent and piperidine (15 drops) as well as acetic acid (15 drops) as catalysts. The reaction system was heated to 80 °C and refluxed for about 24 h in the atmosphere of nitrogen. The solvent is removed by evaporation after the reaction system was cooled to room temperature, and a large amount of dark red solid was obtained by dissolving the oil with dichloromethane and adding petroleum

ether. The crude product was further purified by column chromatography (petroleum ether: ethyl acetate =2:1, v/v), and **CTPA-OH** which still contained a small amount of impurity matter was obtained (0.97 g, 42.3% yield). The product was directly applied to the next reaction. HRMS (ESI positive): calc. for  $C_{30}H_{21}NO_4^+$ ,  $[M+H]^+$  460.1543, found 460.1545 (Fig. S11, ESI<sup>†</sup>).

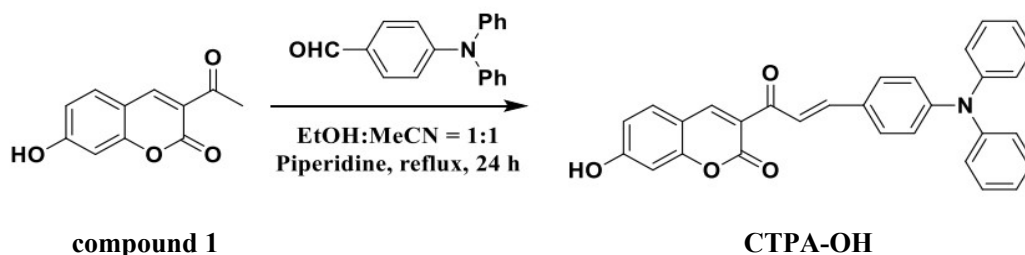

### Synthesis of the probe CTPA

The probe **CTPA** was prepared by **CTPA-OH** (0.46 g, 1.0 mmol) and N,N-dimethylthioacyl chloride (0.73 g, 6.0 mmol) with dichloromethane (10 mL) as the solvent and triethylamine (0.30 g, 3.0 mmol) as the acid binding agent. The N,N-dimethylthioacyl chloride (dissolved in 2 mL dichloromethane) was added at 0 °C and the mixture was stirred for 1 h, after which the reaction system was sequentially stirred for 10 h at the room temperature. The crude product was obtained after removing solvent by evaporation, and was further purified by column chromatography (dichloromethane). Finally, the **CTPA** was obtained as an orange solid (0.25 g, 45.6%). <sup>1</sup>H NMR (400 MHz, CDCl<sub>3</sub>) δ 8.54 (d, *J* = 22.8 Hz, 1H), 7.81 (q, *J* = 15.6 Hz, 2H), 7.67 (dd, *J* = 8.4 Hz, *J* = 3.6 Hz, 1H), 7.52 (d, *J* = 8.6 Hz, 1H), 7.31 (t, *J* = 7.8 Hz, 4H), 7.21 – 7.06 (m, 10H), 7.01 (d, *J* = 8.6 Hz, 1H), 3.47 (s, 3H), 3.39 (s, 3H). <sup>13</sup>C NMR (100 MHz, CDCl<sub>3</sub>) δ 186.3, 186.0, 159.1, 158.2, 155.8, 150.5, 147.2, 146.7, 145.2, 130.4, 130.3, 129.5, 127.7, 125.6, 124.9, 124.3, 121.3, 121.2, 120.6, 116.5, 111.5, 43.4, 39.1, 29.7. HRMS (ESI positive): calc. for  $C_{33}H_{27}N_2O_4S^+$ ,  $[M+H]^+$  547.1686, found 547.1657 (Fig. S12-S14, ESI<sup>†</sup>).

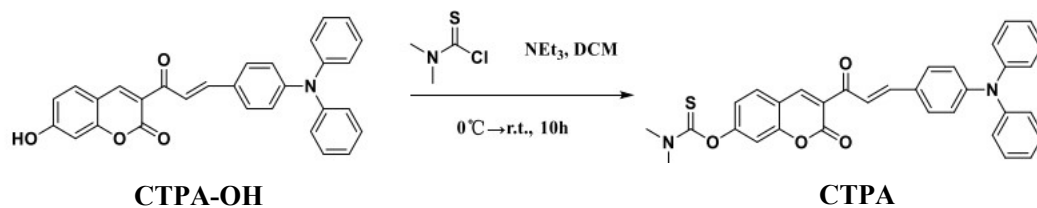

## Preparation of solution of probe CTPA and analytes

Probe stock solutions of **CTPA** ( $1 \times 10^{-3}$  M) were prepared in dimethyl sulfoxide (DMSO) or tetrahydrofuran (THF) and stored at 4 °C. Absorption and emission spectra related to sodium hypochlorite were tested in PBS buffer solution (pH = 7.4) containing 1% THF. Spectral tests of polar response were performed in THF/H<sub>2</sub>O (containing 1% DMSO) and DMSO/H<sub>2</sub>O. The polarity of mixed solution was adjusted by changing the volume ratio of THF or DMSO to H<sub>2</sub>O, and expressed by polar empirical constant  $E_T$  (30) according to the literature.<sup>2</sup> pH stability experiment was conducted in H<sub>2</sub>O (containing 1% DMSO) by adjusting the above system with 0.1 M hydrochloric acid solution and 0.1 M sodium hydroxide solution. Viscosity study was conducted in glycerol/H<sub>2</sub>O system by adjusting the volume ratio of glycerol to H<sub>2</sub>O. The test solution ( $1 \times 10^{-5}$  M) was obtained by adding 100 μL of probe stock solutions to 10 mL colorimetric tube and diluting the probe solution with the corresponding solvent system to the scale line.

The preparation of sodium hypochlorite solution was completed by diluting the commercial sodium hypochlorite solution, which concentration was calculated according to the absorbance of UV-vis absorption spectral at 292 nm.<sup>3</sup> The solutions ( $1 \times 10^{-1}$  M) of various amino acids, cations, anions as well as reactive sulfur species (RSS) were prepared with glutamic acid (Glu), arginine (Arg), glycine (Gly), lysine (Lys), histidine(His), tryptophan (Trp), cysteine (Cys), homocysteine (Hcy), FeCl<sub>3</sub>·6H<sub>2</sub>O, AlCl<sub>3</sub>, FeCl<sub>2</sub>·4H<sub>2</sub>O, CdCl<sub>2</sub>, BaCl<sub>2</sub>·2H<sub>2</sub>O, CuSO<sub>4</sub>·5H<sub>2</sub>O, ZnSO<sub>4</sub>·7H<sub>2</sub>O, CaCl<sub>2</sub>, MgSO<sub>4</sub>, NaCl, KCl, NH<sub>4</sub>Cl, KF·2H<sub>2</sub>O, NaBr, KI, Na<sub>2</sub>S<sub>2</sub>O<sub>3</sub>, Na<sub>2</sub>S<sub>2</sub>O<sub>5</sub>, KHSO<sub>4</sub>, Na<sub>2</sub>SO<sub>3</sub>, NaHS, Na<sub>2</sub>S in deionized water. Other reactive oxygen species and reactive

nitrogen species need be prepared just before the testing moment. Tert-butyl hydroperoxide (TBHP) was delivered from 10% commercial aqueous solution. Nitric oxide (NO) was generated from sodium nitroprusside (SNP, CAS: 13755-38-9) [4]. Other ROS including hydroxyl radical ( $\cdot\text{OH}$ ), tert-butoxy radical ( $\cdot\text{O}^t\text{Bu}$ ), peroxyxynitrite ( $\text{ONOO}^-$ ) and singlet oxygen ( $^1\text{O}_2$ ) were obtained by reported procedures.<sup>3-5</sup> The concentration of  $\text{ONOO}^-$  was determined according to the absorbance at 302 nm ( $\epsilon_{302\text{ nm}} = 1670\text{ M}^{-1}\text{cm}^{-1}$ ). The appropriate aliquot of analyte was added to the testing solution according to need of experiments in the text and was subsequently stored at 37 °C before recording the spectra.

## Determination of the detection limit for $\text{ClO}^-$

The detection limit of probe **CTPA** for  $\text{ClO}^-$  was obtained by the following equation:

$$\text{LOD} = 3\sigma/k$$

Where  $\sigma$  means the standard deviation and  $k$  means the slope of the titration spectra curve within a limited range.

**Table S1.** Dual-fluorescent probes for the detection of  $\text{ClO}^-$ .

| Probes <sup>a</sup>                                                                             | LOD                | Linear interval           | Response time | Another analyte        | Application                | Ref. |
|-------------------------------------------------------------------------------------------------|--------------------|---------------------------|---------------|------------------------|----------------------------|------|
| 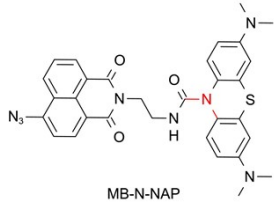<br>MB-N-NAP | 2.74 $\mu\text{M}$ | 0-20 $\mu\text{M}$        | < 5 s         | $\text{H}_2\text{S}$   | H9C2 cells and HepG2 cells | 35   |
| <br>CSU1     | 13 nM              | 100.0-275.0 $\mu\text{M}$ | ----          | $\text{H}_2\text{O}_2$ | MCF-7 cells                | 36   |
| <br>PBC1     | 13 nM              | 40-200 $\mu\text{M}$      | within 20 s   | $\text{SO}_2$          | HeLa cells and zebrafish   | 37   |

|                                                                                                                  |         |           |                |                  |                            |           |
|------------------------------------------------------------------------------------------------------------------|---------|-----------|----------------|------------------|----------------------------|-----------|
| 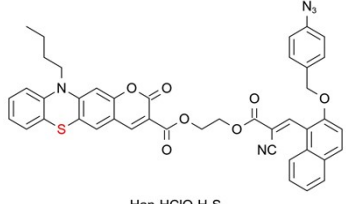 <p>Han-HClO-H<sub>2</sub>S</p> | 17 nM   | 50-300 mM | ----           | H <sub>2</sub> S | MCF-7 cells                | 38        |
|  <p>MB-NAP-N<sub>3</sub></p>    | 32 nM   | 0-90 μM   | 40 s           | H <sub>2</sub> S | HeLa cells and zebrafish   | 39        |
|  <p>Lyso-HA-HS</p>              | 7.3 nM  | 0-50 μM   | within seconds | H <sub>2</sub> S | HeLa cells                 | 40        |
|  <p>RPC-1</p>                  | 19.8 nM | 0-100 μM  | within seconds | H <sub>2</sub> S | RAW264.7 cells and mice    | 41        |
|  <p>CTPA</p>                  | 11.9 nM | 0-19 μM   | <30 s          | Polarity         | Hela cell and NIH-3T3 cell | this work |

a. The red part in the structure is the recognition site for ClO<sup>-</sup>.

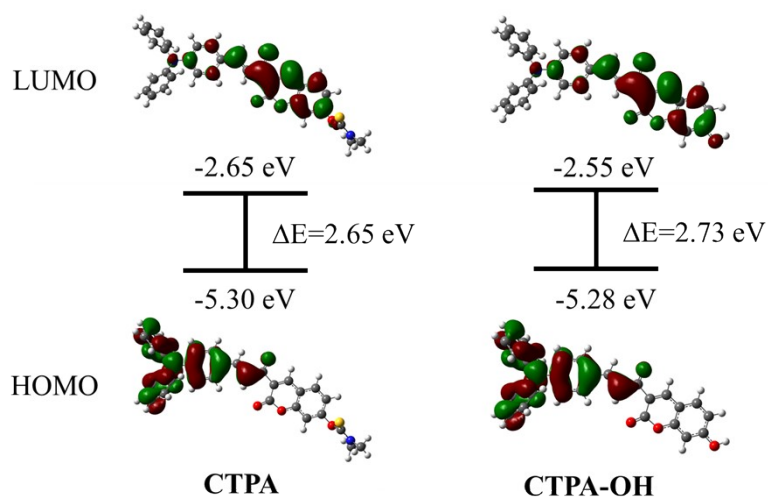

**Fig. S1.** Molecular orbital amplitude plots of HOMO/LUMO energy levels of CTPA and CTPA-OH

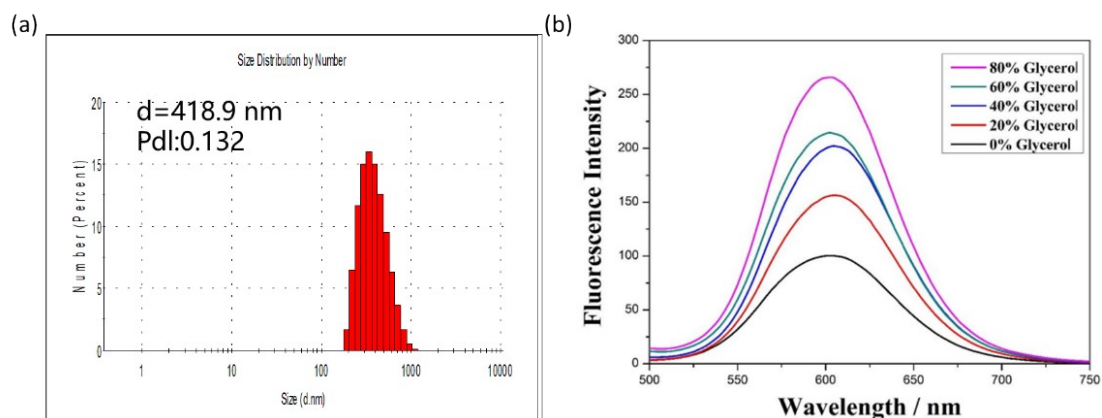

**Fig. S2.** (a). DLS data of CTPA (10  $\mu\text{M}$ ) (b). Fluorescence spectra of probe CTPA (10  $\mu\text{M}$ ) in the mixture of H<sub>2</sub>O and glycerol (glycerol from 0% to 80%)

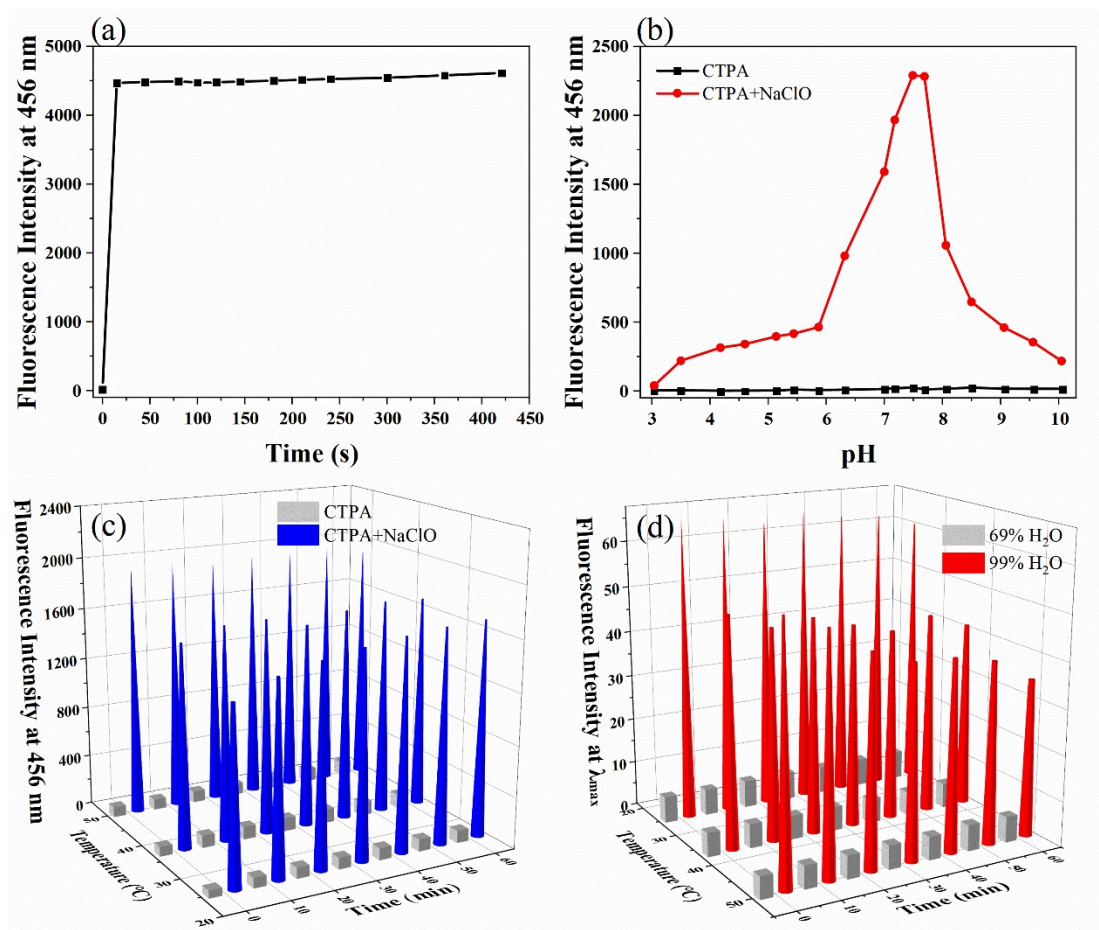

**Fig. S3.** The fluorescence intensity of CTPA (10  $\mu\text{M}$ ) (a) within 7 minutes after adding 60  $\mu\text{M}$  NaClO; (b) before and after adding 60  $\mu\text{M}$  NaClO at different pH; at 25°C, 37°C and 50°C (c) before and after adding 100  $\mu\text{M}$  NaClO,  $\lambda_{\text{ex}} = 410 \text{ nm}$  and (d) in THF/H<sub>2</sub>O with 69%/99% water content,  $\lambda_{\text{ex}} = 460 \text{ nm}$ .



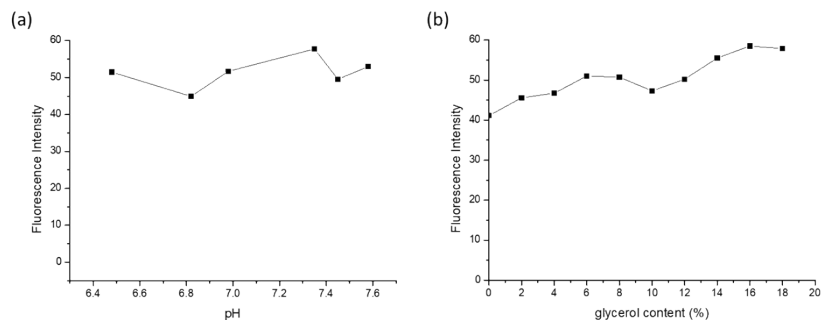

**Fig. S4.** (a). The pH dependence of fluorescence intensity at the maximum emission of CTPA (10  $\mu\text{M}$ ) (b). The viscosity dependence of fluorescence intensity at the maximum emission of CTPA (10  $\mu\text{M}$ ) in the mixture of  $\text{H}_2\text{O}$  and glycerol (glycerol from 0% to 20%),  $\lambda_{\text{ex}} = 460 \text{ nm}$

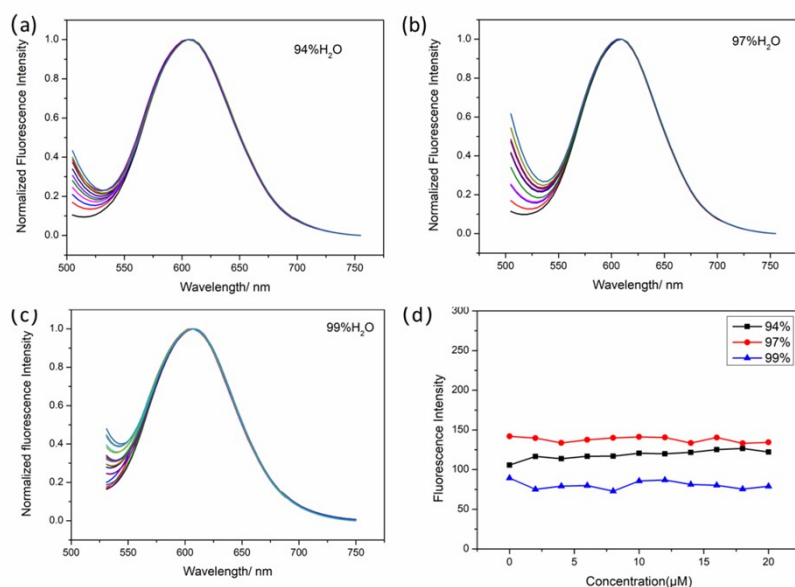

**Fig. S5.** Normalized fluorescence spectra of CTPA (10  $\mu\text{M}$ ) with various concentrations NaClO (0-20  $\mu\text{M}$ ) in solvents of (a). 94% (b). 97% (c). 99% water content and (d). fluorescence intensity variety at corresponding maximum emission,  $\lambda_{\text{ex}} = 460 \text{ nm}$

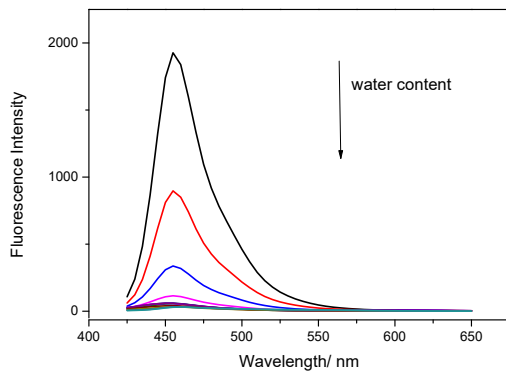

**Fig. S6.** Fluorescence spectra of CTPA (10  $\mu\text{M}$ ) adding 10  $\mu\text{M}$  NaClO in the mixture of  $\text{H}_2\text{O}$  and THF ( $f_w = 77\%$  to  $99\%$ ),  $\lambda_{\text{ex}} = 410 \text{ nm}$

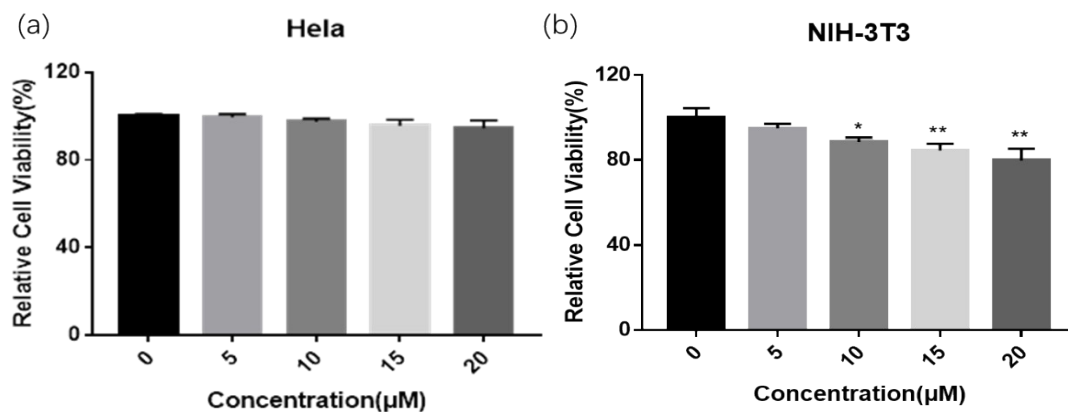

**Fig. S7.** Effects of the probe CTPA with various concentrations (0-20 μM) on the viability of the (a). HeLa cells and (b). NIH-3T3 cells.

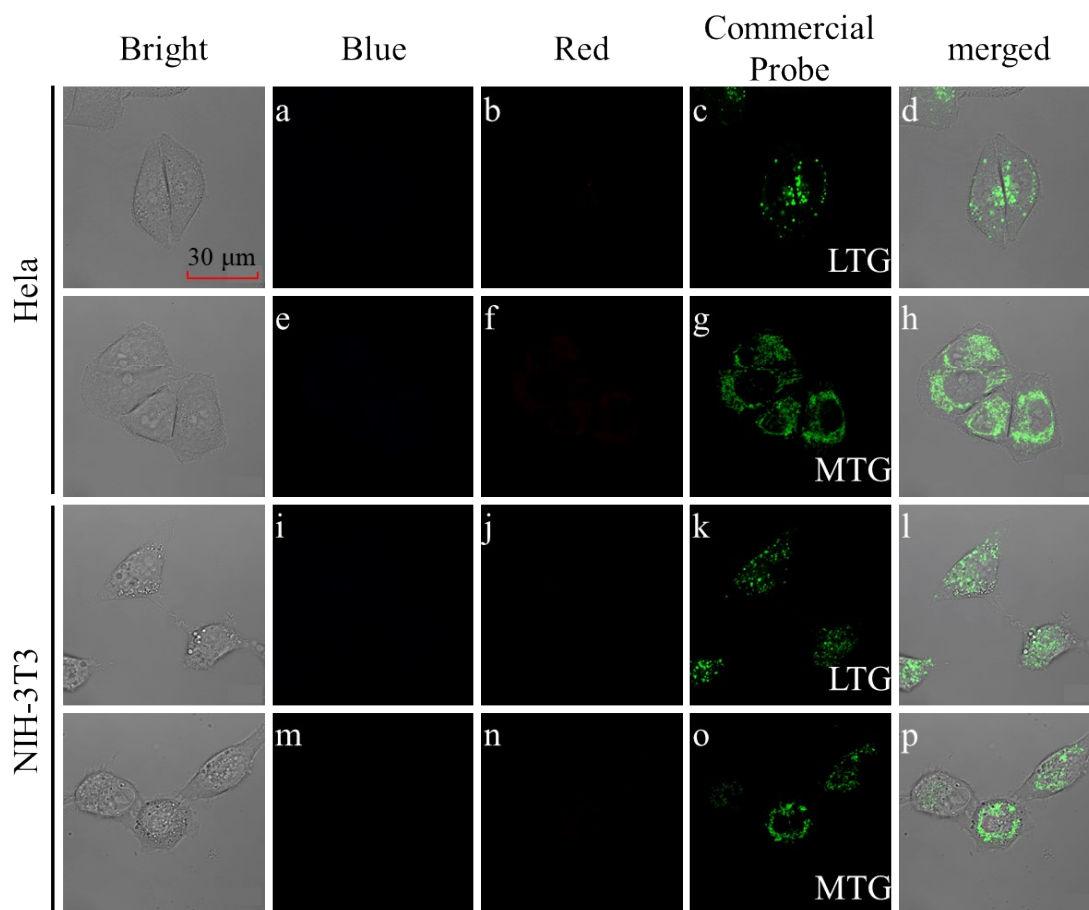

**Fig. S8.** Co-localization experiment of CTPA and (a-d, i-l) LTG and (e-h, m-p) MTG in HeLa and NIH-3T3 cells respectively.

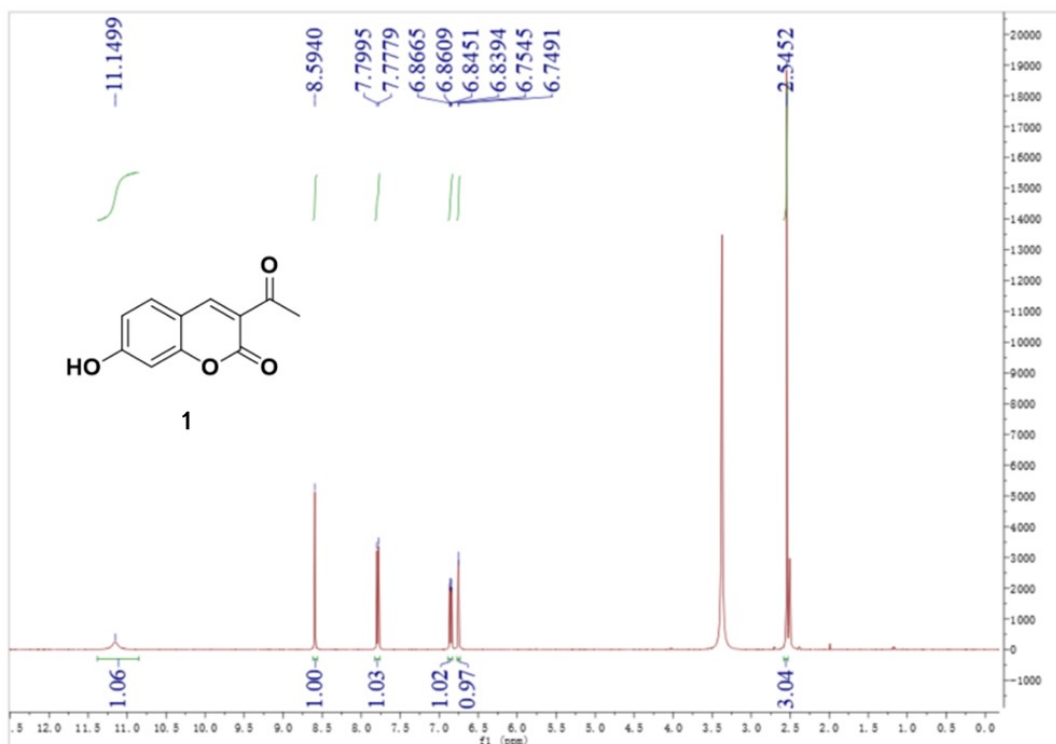

Fig. S9.  $^1\text{H}$  NMR spectrum of compound **1** in  $\text{DMSO-}d_6$ .

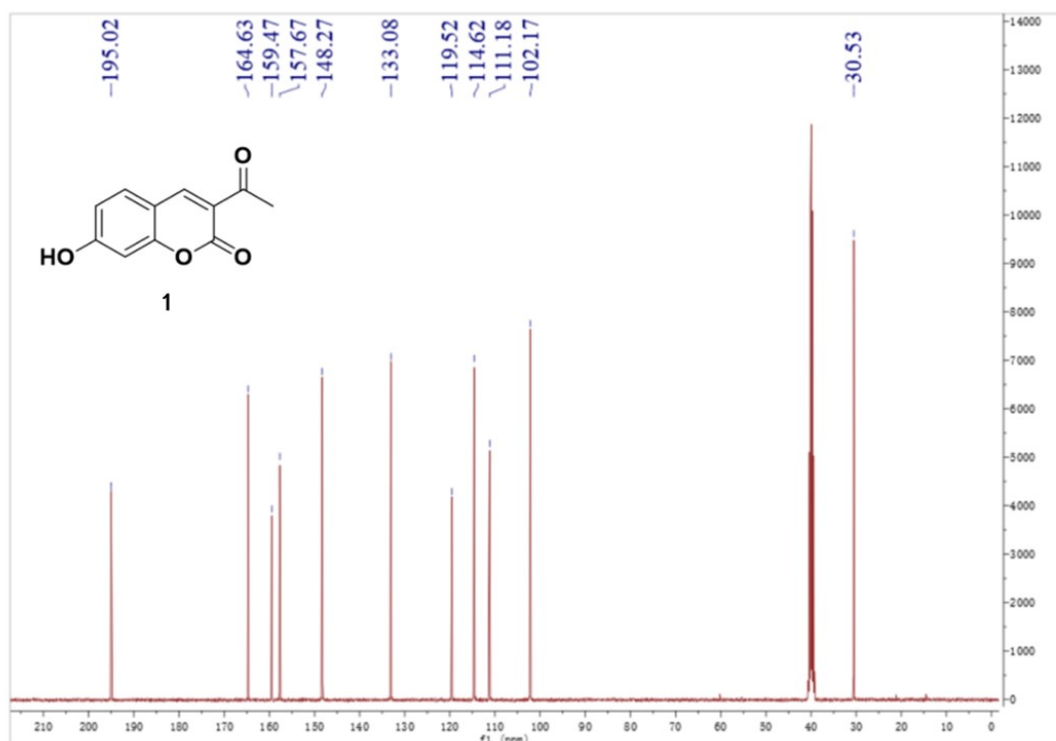

Fig. S10.  $^{13}\text{C}$  NMR spectrum of compound **1** in  $\text{DMSO-}d_6$ .

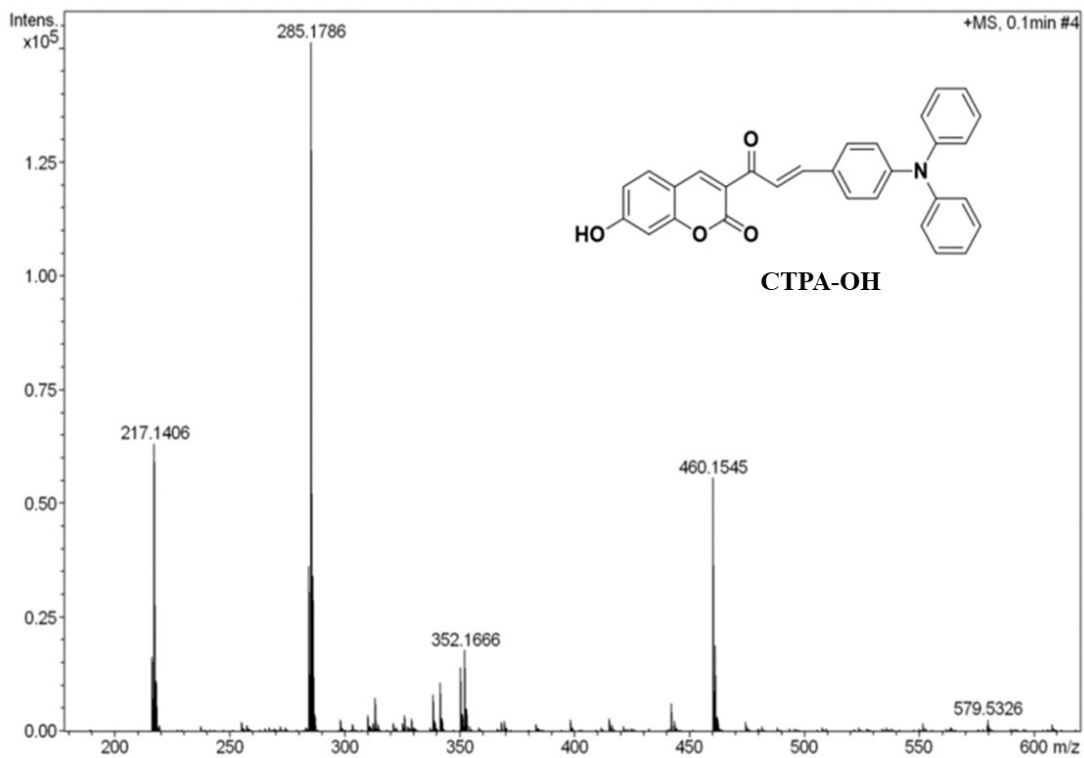

Fig. S11. HRMS spectrum of CTPA-OH

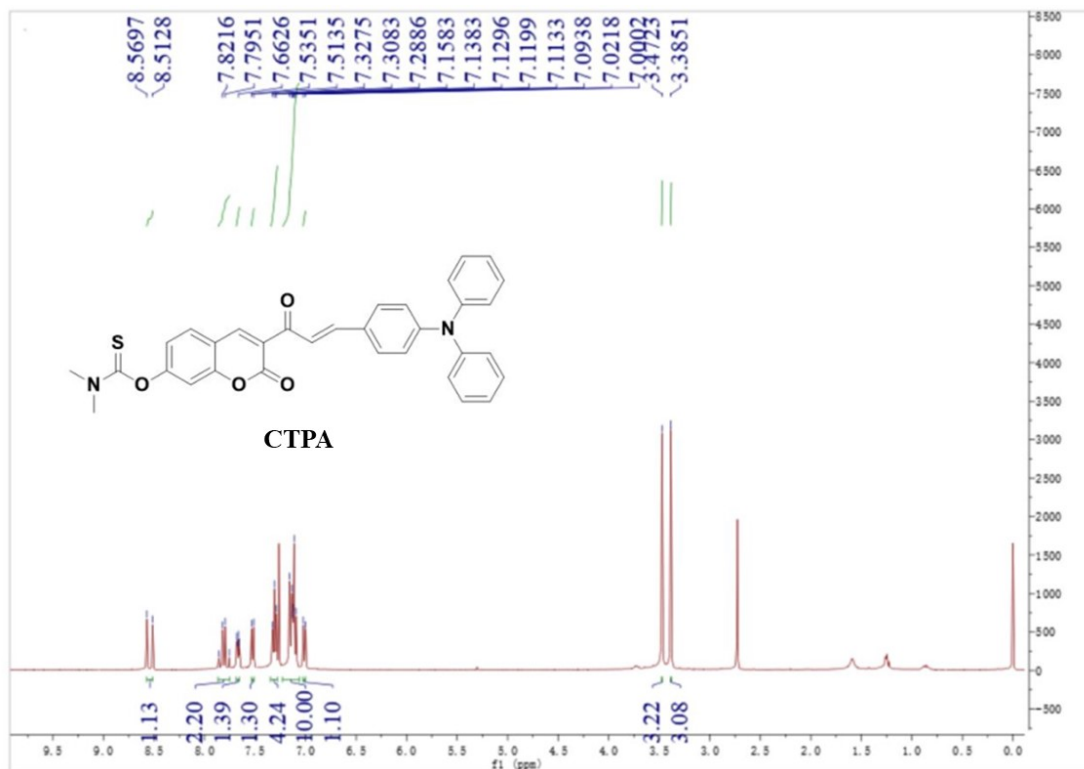

Fig. S12.  $^1\text{H}$  NMR spectrum of CTPA in  $\text{CDCl}_3$

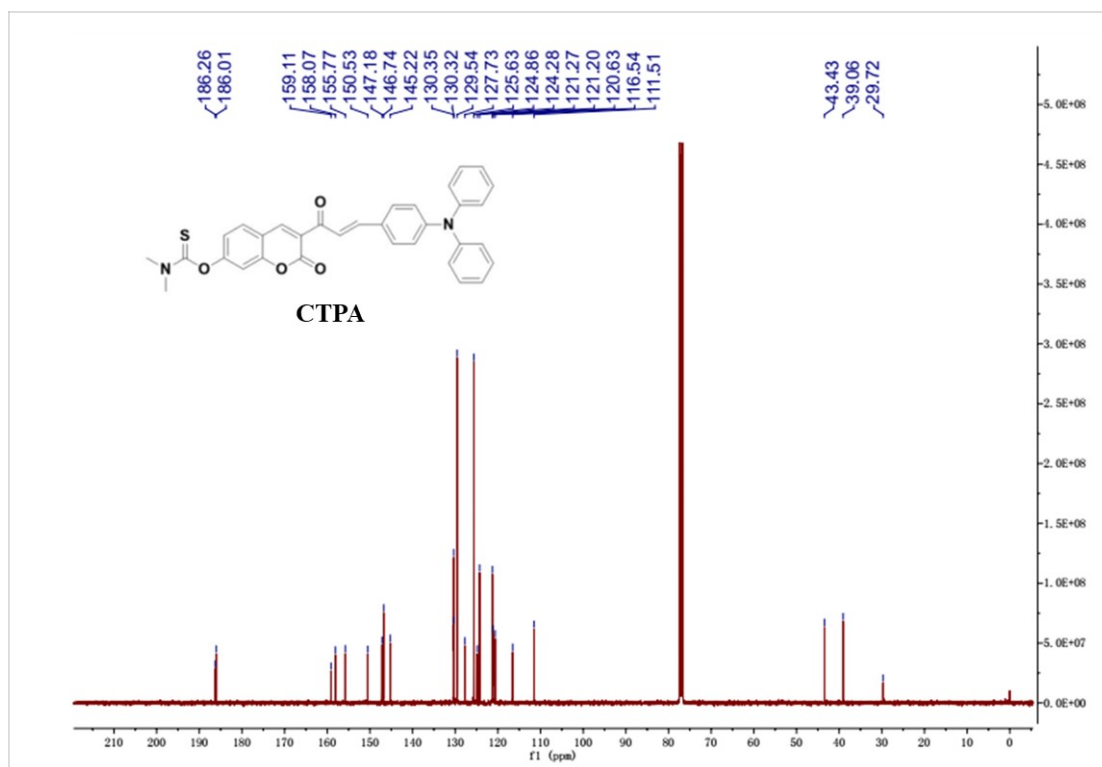

**Fig. S13.**  $^{13}\text{C}$  NMR spectrum of CTPA in  $\text{CDCl}_3$

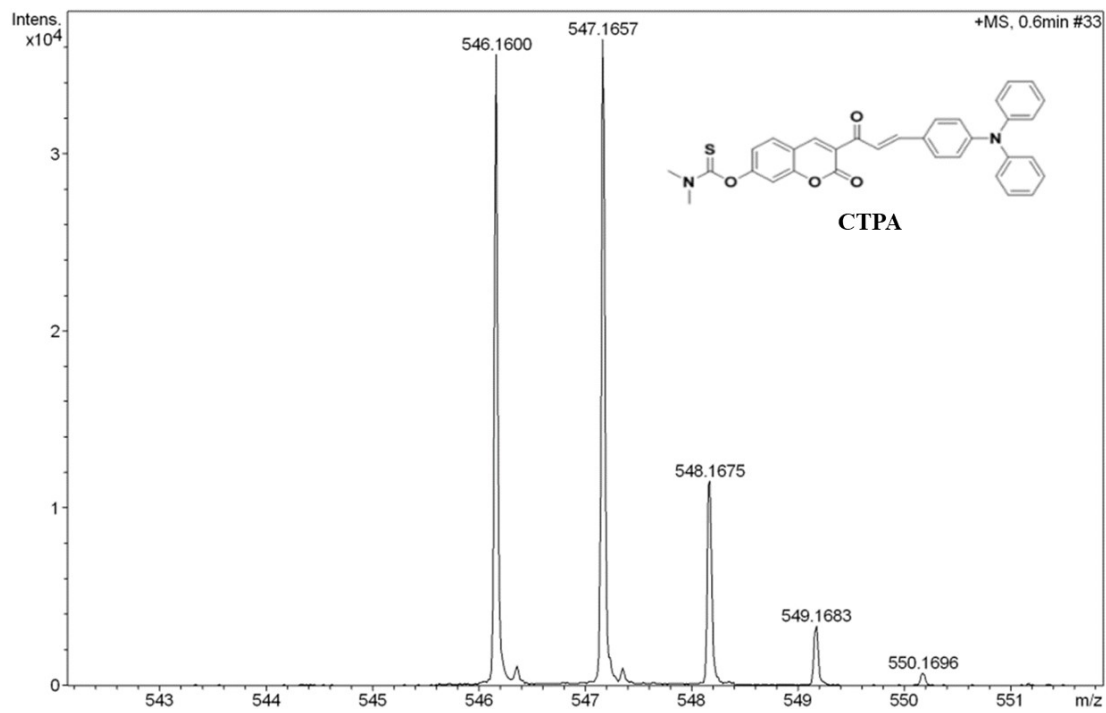

**Fig. S14.** HRMS spectrum of CTPA

## References:

- [1] Dai X, Wu QH, Wang PC, Tian J, Xu Y, Wang SQ, Miao JY and Zhao BX, *Biosensors and Bioelectronics*, 2014, **59**, 35-39.
- [2] Reichardt C, *Chemical reviews*, 1994, **94**(8), 2319-2358.
- [3] Mao ZQ, Jiang H, Li Z, Zhong C, Zhang W and Liu ZH, *Chemical Science*, 2017, **8**(6), 4533-4538.
- [4] Xie XL, Tang FY, Liu GZ, Li Y, Su XX, Jiao XY, Wang X and Tang B, *Analytical Chemistry*, 2018, **90**(19), 11629-11635.
- [5] Srikun D, Miller EW, Dornaille DW and Chang CJ, *Journal of the American Chemical Society*, 2008, **130**(14), 4596-4597.
